# Supplementary material
Source: Springer Nature journal article supplement (https://www.springermedizin.de/resource/supplementary/12986_2010_260_MOESM5_ESM.pdf/25655700)

% Calcium Free Diameter

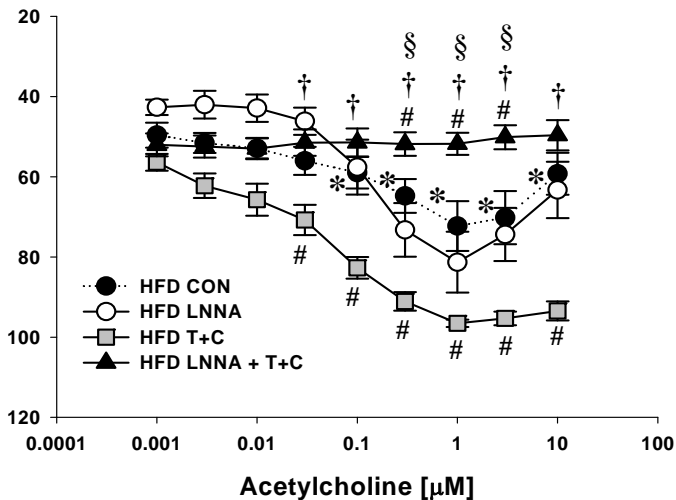

% Calcium Free Diameter

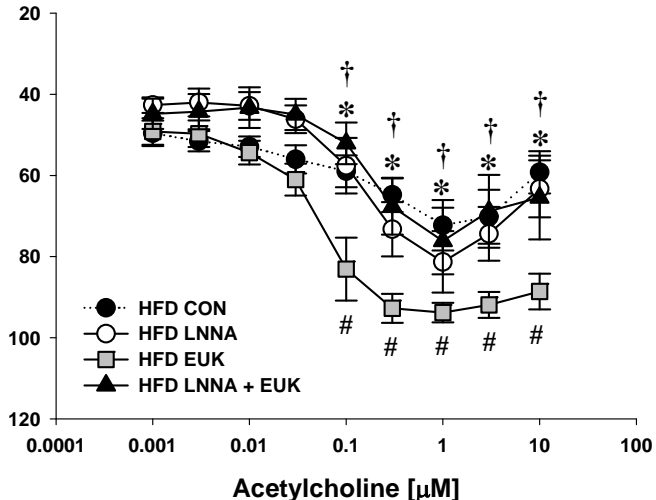

Supplement: MOESM5 [file 25655700]
